# Supplementary material
Source: PubMed Central journal article supplement (PMC4948054)

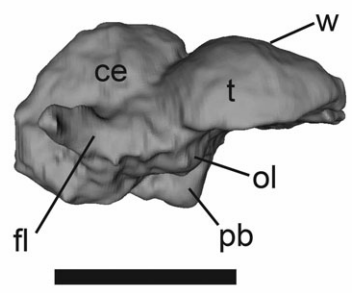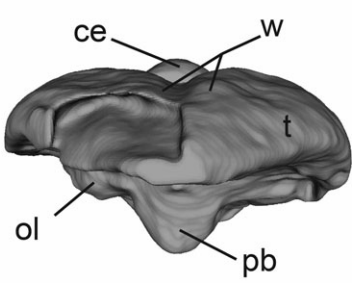

Supplement: JOA-229-228-s001.pdf [file JOA-229-228-s001.pdf]

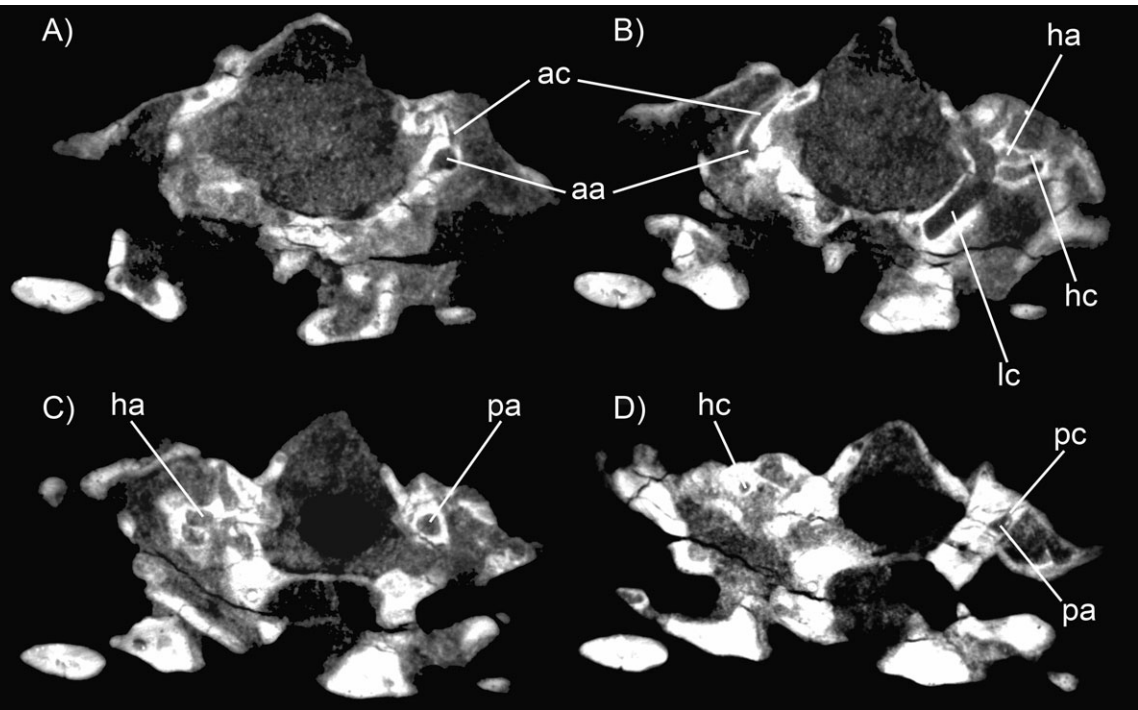

Supplement: JOA-229-228-s002.pdf [file JOA-229-228-s002.pdf]
